# Supplementary material for: The Yeast Pif1 Helicase Prevents Genomic Instability Caused by G-Quadruplex-Forming CEB1 Sequences In Vivo
Source: PubMed Central journal article supplement (PMC2673046; doi:10.1371/journal.pgen.1000475), 2009-05-08
Supplement: pgen.1000475.s001.pdf [file pgen.1000475.s001.pdf]

Figure S1

CEB1-1.8

GGGGGGAGGGAGGGAGGGAGGGA  
GGGAGGGAGGGAGGGTGGCCTGCAGAGGTCCCTGGGCTGA (42)  
AGAGGGGAGAGTGGCCTGCAGAGGTCCCTGGGCTGA (41)  
GGGGGGAGGGAGAGTGGCCTGCGGAGGTCCCTGGGCTGA (40)  
GGGGGGAGGGAGGGTGGCCTGCGGAGGTCCCTGGGCTGA (39)  
GGGGGGAGGGAGGGAGGGTGGCCTGCGGAGGTCCCTGGGCTGA (38)  
GGGGGGAGGGAGAGTGGCCTGCAGAGGTCCCTGGGCTGA (37)  
GGGGGGAGGGAGAGTGGCCTGCAGAGGTCCCTGGGCTGA (36)  
GGGAGGGAGGGAGGGAGGGTGGCCTGCAGAGGTCCCTGGGCTGA (35)  
GGGGGGAGGGAGGGAGGGTGGCCTGCGGAGGTCCCTGGGCTGA (34)  
GGGGGGAGGGAGGGAGGGTGGCCTGCGGAGGTCCCTGGGCTGA (33)  
GGGGGGAGGGAGGGAGGCCTGCGGAGGTCCCTGGGCTGA (32)  
GGGGGGAGGGAGGGTGGCCTGCAGAGGTCCCTGGGCTGA (31)  
GGGGGGAGGGAGAGTGGCCTGCAGAGGTCCCTGGGCTGA (30)  
GGGAGGGAGGGAGGGAGGGTGGCCTGCAGAGGTCCCTGGGCTGA (29)  
GGGGGGAGGGAGGGTGGCCTGCAGAGGTCCCTGGGCTGA (28)  
GGGGGGAGGGAGGGTGGCCTGCGGAGGTCCCTGGGCTGA (27)  
GGGGGGAGGGAGGGAGGCCTGCGGAGGTCCCTGGGCTGA (26)  
GGGGGGAGGGAGAGTGGCCTGCAGAGGTCCCTGGGCTGA (25)  
GGGGGGAGGGAGGGAGGGTGGCCTGCAGAGGTCCCTGGGCTGA (24)  
GGGAGGGAGGGAGGGAGGGTGGCCTGCAGAGGTCCCTGGGCTGA (23)  
GGGGGGAGGGAGGGTGGCCTGCGGAGGTCCCTGGGCTGA (22)  
GGGGGGAGGGAGGGTGGCCTGCAGAGGTCCCTGGGCTGA (21)  
GGGGGGAGGGAGGGAGGGTGGCCTGCGGAGGTCCCTGGGCTGA (20)  
GGGGGGAGGGAGGGTGGCCTGCAGAGGTCCCTGGGCTGA (19)  
GGGGGGAGGGAGGGTGGCCTGCGGAGGTCCCTGGGCTGA (18)  
GGGGGGAGGGAGGGAGGGTGGCCTGCGGAGGTCCCTGGGCTGA (17)  
GGGGGGAGGGAGGGAGGGTGGCCTGCAGAGGTCCCTGGGCTGA (16)  
GGGGGGAGGGAGGGTGGCCTGCAGAGGTCCCTGGGCTGA (15)  
GGGGGGAGGGAGGGTGGCCTGCGGAGGTCCCTGGGCTGA (14)  
GGGGGGAGGGAGGGAGGGTGGCCTGCGGAGGTCCCTGGGCTGA (13)  
GGGGGGAGGGAGGGAGGGTGGCCTGCGGAGGTCCCTGGGCTGA (12)  
GGGGGGAGGGAGGGTGGCCTGCGGAGGTCCCTGGGCTGA (11)  
GGGGGAGGGAGGGTGGCCTGCAGAGGTCCCTGGGCTGA (10)  
GGAGGGAGGGAGGGTGGCCTGCGGAGGTCCCTGGGCTGA (9)  
GGGGGGAGGGAGGGAGGGTGGCCTGCAGAGGTCCCTGGGCTGA (8)  
GGGGGGAGGGAGGGTGGCCTGCAGAGGTCCCTGGGCTGA (7)  
GGGAGGGAGGGAGGGAGGGTGGCCTGCGGAGGTCCCTGGGCTGA (6)  
GGGGGGAGGGAGGGTGGCCTGCGGAGGTCCCTGGGCTGA (5)  
GGGGGGAGGGAGGGTGGCCTGCGGAGGTCCCTGGGCTGA (4)  
GGGGGGAGGGAGGGTGGCCTGCGGAGGTCCCTGGGCTGA (3)  
GGGGGGAGGGAGGGAGGGTGGCCTGCGGAGGTCCCTGGGCTGA (2)  
GGGGGAGGGAGGGTGGCCTGCAGAGGTCCCTGGGCTGA (1)
