# Supplementary material for: The Yeast Pif1 Helicase Prevents Genomic Instability Caused by G-Quadruplex-Forming CEB1 Sequences In Vivo
Source: PubMed Central journal article supplement (PMC2673046; doi:10.1371/journal.pgen.1000475), 2009-05-08

**Figure S2**

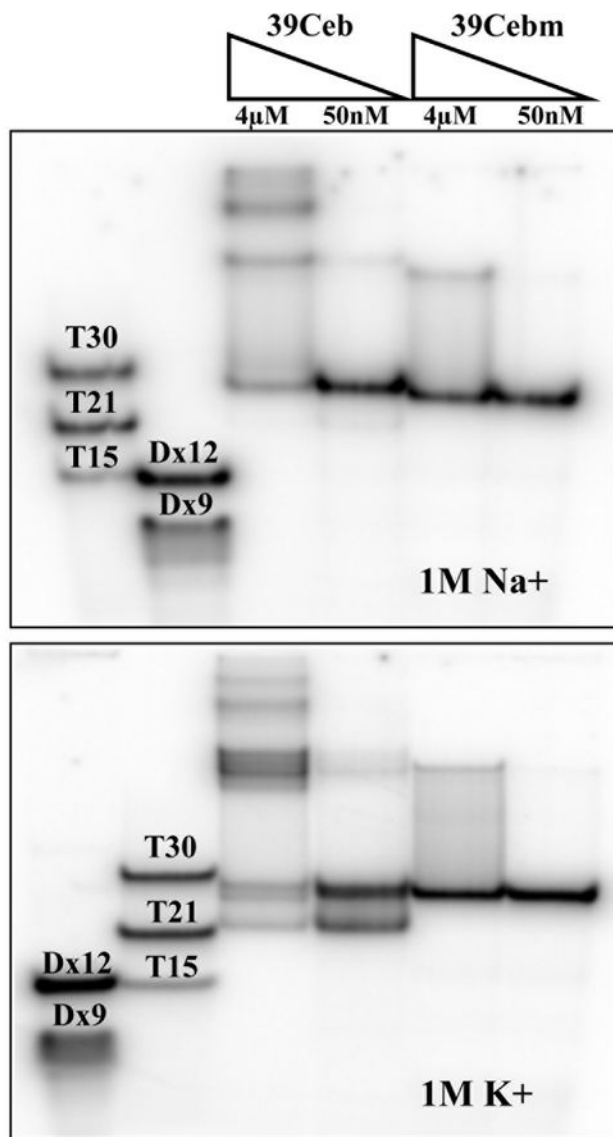

Supplement: pgen.1000475.s002.pdf [file pgen.1000475.s002.pdf]
