# Supplementary material for: The Yeast Pif1 Helicase Prevents Genomic Instability Caused by G-Quadruplex-Forming CEB1 Sequences In Vivo
Source: PubMed Central journal article supplement (PMC2673046; doi:10.1371/journal.pgen.1000475), 2009-05-08
Supplement: pgen.1000475.s003.pdf [file pgen.1000475.s003.pdf]

# Figure S3

**A**

Motif CEB1-WT 5' **GGGGGGAGGGAGGGTGGCCTGCGGAGGTCCCTGGGCTGA** 3'  
 Motif CEB1-Gmut 5' **GCGCGGAGTGAGAGTGGCCTGCGGAGGTCCCTGCGCTGA** 3'

**B**

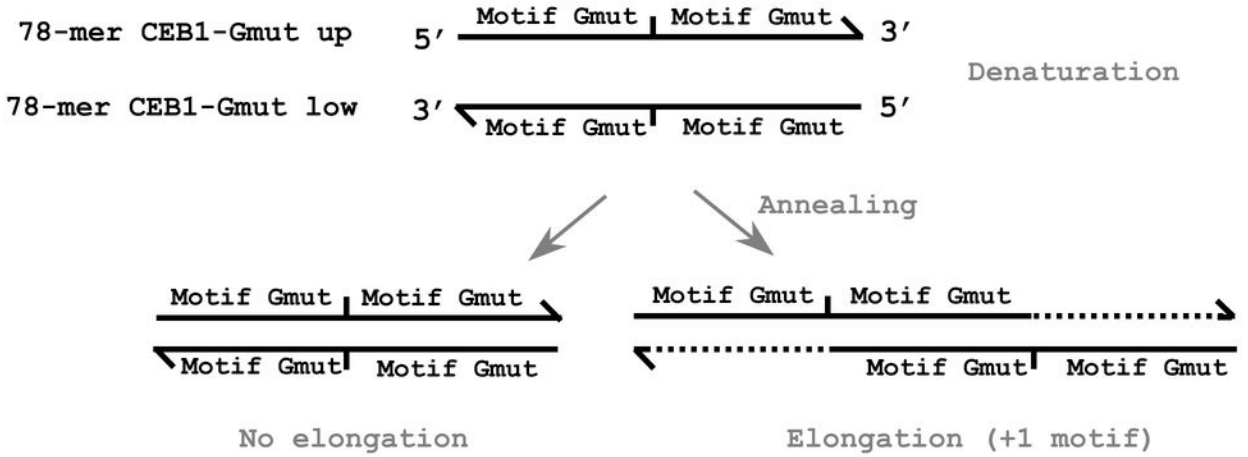

**C**

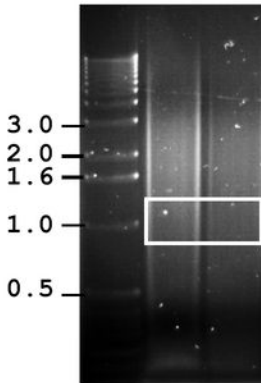

**D**

## Synthetic CEB1-WT-1.0

Motif CEB1-WT:

5' GGGGGGAGGGAGGGTGGCCTGCGGAGGTCCCTGGGCTGA 3'

|                                           |    |
|-------------------------------------------|----|
| GGGGGGAGGGAGGGTGGCCTGCGGAGGTCCCTGGGCTGA   | 1  |
| GGGGGGAGGGAGGGTGGCCTGCGGAGGTCCCTGGGCTGA   | 2  |
| GGGGGGAGGGAGGGTGGCCTGCGGAGGTCCCTGGGCTGA   | 3  |
| GGGGGGAGGGAGGGTGGCCTGCGGAGGTCCCTGGGCTGA   | 4  |
| GGGGGGAGGGAGGGTGGCCTGCGGAGGTCCCTGGGCTGA   | 5  |
| GGGGGGAGGGAGGGTGGCCTGCGGAGGTCCGGGCTGA     | 6  |
| GGGGGGAGGGAGGGTGGCCTGCGGAGGTCCCTGGGCTGA   | 7  |
| GGGGGGAGGGAGGGTGGCCTGCGGAGGTCCCTGGGCTGA   | 8  |
| GGGGGGAGGGAGGGTGGCCTGCGGAGGTCCCTGGGCTGA   | 9  |
| GGGGGGAGGGAGGGTGGCCTGCGGAGGTCCCTGGGCTGA   | 10 |
| GGGGGGAGGGAGGGTGGCCTGCGGAGGTCCCTGGGCTGA   | 11 |
| GGGGGGAGGGAGGGTGGCCTGCGGAGGTCCCTGGGCTGA   | 12 |
| GGGGGGAGGGAGGGTGGCCTGCGGAGGTCCCTGGGCTGA   | 13 |
| GGGGGGAGGGAGGGTGGCCTGCGGAGGTCCCTGGGCTGA   | 14 |
| GGGGGGAGGGAGGGTGGCCTGCGGA---TCCCTGGGCTGA  | 15 |
| GGGGGGAGGGAGGGTGGCCTGCGGAGGTCCCTGGGCTGA   | 16 |
| GGGGGGAGGGAGGGTGGCCTGCGGAGGTCCCTGGGCTGA   | 17 |
| GGGGGGAGGGAGGGTGGCCTGCGGAGGTCC---TGGGCTGA | 18 |
| GGGGGGAGGGAGGGTGGCCTGCGGAGGTCCCTGGGCTGA   | 19 |
| GGGGGGAGGGAGGGTGGCCTGCGGAGGTCCCTGGGCTGA   | 20 |
| GGGGGGAGGGAGGGTGGCCTGCGGAGGTCCCTGGGCTGA   | 21 |
| GGGGGGAGGGAGGGTGGCCTGCGGAGGTCCCTGGGCTGA   | 22 |
| GGGGGGAGGGAGGGTGGCCTGCGGAGGTCCCTGGGCTGA   | 23 |
| GGGGGGAGGGAGGGTGGCCTGCGGAGGTCCCTGGGCTGA   | 24 |
| GGGGGGAGGGAGGGTGGCCTGCGGAGGTCCCTGGGCTGA   | 25 |
| GGGGGGAGGGAGGGTGGCCTGC                    | 26 |

# Figure S3

## E Synthetic CEB1-Gmut-1.7

Motif CEB1-Gmut:

5' GCGCGGAGTGAGGTGGCCTGCGGAGGTCCTGCGTGA 3'

|                                         |    |
|-----------------------------------------|----|
| GCGC-----GTGGCCTGCGGAGGTCCTGCGTGA       | 1  |
| GCGCGGAGTGAGAGTGGCCTGCGGAGGTCCTGCGTGA   | 2  |
| GCGCGGAGTGAGAGTGGCCTGCGGAGGTCCTGCGTGA   | 3  |
| GCGCGGAGTGAGAGTGGCCTGCGGAGGTCCTGCGTGA   | 4  |
| GCGCGGAGTGAGAGTGGCCTGCGGAGGTCCTGCGTGA   | 5  |
| GCGCGGAGTGAGAGTGGCCTGCGGAGGTCCTGCGTGA   | 6  |
| GCGCGGAGTGAGAGTGGCCTGCGGAGGTCCTGCGTGA   | 7  |
| GCGCGGAGTGAGAGTGGCCTGCGGAGGTCCTGCGTGA   | 8  |
| GCGCGGAGTGAGAGTGGCCTGCGGAGGTCCTGCGTGA   | 9  |
| GCGCGGAGTGAGAGTGGCCTGCGGAGGTCCTGCGTGA   | 10 |
| GCGCGGAGTGAGAGTGGCCTGCGGAGGTCCTGCGTGA   | 11 |
| GCGCGGAGTGAGAGTGGCCTGCGGAGGTCCTGCGTGA   | 12 |
| GCGCGGAGTGAGAGTGGCCTGCGGAGGTCCTGCGTGA   | 13 |
| GCGCGGAGTGAGAGTGGCCTGCGGAGGTCCTGCGTGA   | 14 |
| GCGCGGAGTGAGAGTGG---GCGGAG---CCCTGCGTGA | 15 |
| GCGCGGAGTGAGAGTGGCCTGCGGAGGTCCTGCGTGA   | 16 |
| GCGCGGAGTGAGAGTGGCCTGCGGAGGTCCTGCGTGA   | 17 |
| GCGCGGAGTGAGAGTGGCCTGCGGAGGTCCTGCGTGA   | 18 |
| GCGCGGAGTGAGAGTGGCCTGCGGAGGTCCTGCGTGA   | 19 |
| GCGCGGAGTGAGAGTGGCCTGCGGAGGTCCTGCGTGA   | 20 |
| GCGCAGAGTGAGAGTGGCCTGCGGAGGTCCTGCGTGA   | 21 |
| GCGCGGAGTGAGAGTGGCCTGCGGAGGTCCTGCGTGA   | 22 |
| GCGCGGAGTGAGAGTGGCCTGCGGAGGTCCTGCGTGA   | 23 |
| GCGCGGAGTGAGAGTGGCCTGCGGAGGTCCTGCGTGA   | 24 |
| GCGCGAGTGAGAGTGGCCTGCGGAGGTCCTGCGTGA    | 25 |
| GCGCGGAGTGAGAGTGGCCTGCGGAGGTCCTGCGTGA   | 26 |
| GCGCGGAGTGAGAGTGGCCTGCGGAGGTCCTGCGTGA   | 27 |
| GCGCGGAGTGAGAGTGGCCTGCGGAGGTCCTGCGTGA   | 28 |
| GCGCGGAGTGAGAGTGGCCTGCGGAGGTCCTGCGTGA   | 29 |
| GCGCGGAGTGAGAGTGGCCTGCGGAGGTCCTGCGTGA   | 30 |
| GCGCGGAGTGAGAGTGGCCTGCGGAGGTCCTGCGTGA   | 31 |
| GCGCGGAGTGAGAGTGGCCTGCGGAGGTCCTGCGTGA   | 32 |
| GCGCGGAGTGAGAGTGGCCTGCGGAGGTCCTGCGTGA   | 33 |
| GCGCGGAGTGAGAGTGGCCTGCGGAGGTCCTGCGTGA   | 34 |
| GCGCGGAGTGAGAGTGGCCTGCGGAGGTCCTGCGTGA   | 35 |
| GCGCGGAGTGAGAGTGGCCTGCGGAGGTCCTGCGTGA   | 36 |
| GCGCGGAGTGAGAGTGGCCTGCGGAGGTCCTGCGTGA   | 37 |
| GCGCGGAGTGAGAGTGGCCTGCGGAGGTCCTGCGTGA   | 38 |
| GCGCGGAGTGAGAGTGGCCTGCGGAGGTCCTGCGTGA   | 39 |
| GCGCGGAGTGAGAGTGGCCTGCGGAGGTCCTGCGTGA   | 40 |
| GCGCGGAGTGAGAGTGGCCTG-----CCCTGCGTGA    | 41 |
| GCGCGGAGTGAGAGTGGCCTGCGGAGGTCCTGCGTGA   | 42 |
