# Supplementary material for: The Yeast Pif1 Helicase Prevents Genomic Instability Caused by G-Quadruplex-Forming CEB1 Sequences In Vivo
Source: PubMed Central journal article supplement (PMC2673046; doi:10.1371/journal.pgen.1000475), 2009-05-08
Supplement: pgen.1000475.s006.pdf [file pgen.1000475.s006.pdf]

## SUPPLEMENTAL DATA

### Supplemental Materials and Methods

**Yeast strains and plasmids.** *S. cerevisiae* strains were grown as previously described [1]. The relevant genotypes and sources of haploid and diploid *S. cerevisiae* strains (S288C background) used in this study are indicated in Table S1. The CEB1-0.6, CEB1-1.8 and CEB1-3.0 alleles were inserted on chromosome VIII in the *ARG4* promoter as described previously [1,2]. The CEB1-3.5 allele is an expansion of CEB1-1.8 isolated from ORT4841. The *KanMX4* disrupted strains were constructed by PCR amplification of the *geneX::KanMX4* cassette with flanking regions from the BY strains of the EUROSCARF deletants collection. After transformation of the yeast strain ORT2914 with the purified PCR product, G418<sup>R</sup> strains were verified for correct chromosomal integration by Southern blot. *pif1::HIS3* strains were built using plasmid M4754 (provided by David Stillman) which allows replacement of *KanMX4* by *HIS3* [3]. The *rad51::LEU2* and the *rad52::LEU2* disruptions originated from ORT2615 and ORT2916 respectively [4] were introduced by genetic crosses. To construct *DNA2* deletion, the *HygMX4* cassette was amplified from pAG32 [5] with primers containing homology with flanking regions of *DNA2*: DNA2ApMJ696A (5'-GAGTACTCATTTGTGCAAGCAAACACTGACAATTGAAGAGATCGTCAGGATCCCCGGGTTAATTAAGGC-3') and DNA2BpMJ696B (5'-AGCTCGTTTTTCGACACTGGTGCTGTGATAGCTTTCCTGTTATGGAGAAGCTCTTCTTATCCCCCTGTC-3'). The PCR product was used to transform ORT4841 resulting in ORT4848.

The strains ORT4841, ORT2914 and ORD6713-8D were all transformed with replicative plasmids pBK3, pBK1, pMD28, pEAS20 and pBK10 [6]. These plasmids contain various

repetitive tracts in frame with the *URA3* marker for examining micro- and minisatellites instability.

The *hRAS1* minisatellite was amplified by PCR from the p37Y8 plasmid (gift from D. Kirkpatrick) using Ras 5' and Ras 3' primers and Taq polymerase (Invitrogen) as previously described [7]. The PCR fragment was cloned in pGEM-T Easy vector (Promega) and the *ApaI-SpeI* fragment containing *hRAS1* was inserted in pJL82 plasmid derived from pUC19. pJL82 contains a 3.1 kb *HindIII-PstI* fragment from *DED81-ARG4* region in which an unrelated polylinker DNA sequence, polyI, replaces a part of *ARG4* promoter [2]. *arg-* strains (WT, *pif1* $\Delta$  and *rad27* $\Delta$ ) were transformed by electroporation with *HindIII-PstI* fragment containing minisatellite and selected for arginine prototrophy. Correct integration was verified by Southern blot analysis of Arg<sup>+</sup> transformants using *EcoRV/PvuII* digestion and a *DED81* probe.

In order to create *PIF1* point mutations, a *PIF1* fragment was amplified from yeast genomic DNA using PIF1-223-*XhoI* (5'-TCATGCTCGAGACATTAAGAAAGGCGCGTCT-3') and PIF1+1023-*XbaI* (5'-GAATCTCTAGAATCGACAACCAAAGCACCAA-3') primers. This fragment was digested by *XbaI/XhoI* (highlighted in primers) and inserted into integrative vector pRS306 containing *URA3* marker at *XbaI/XhoI* sites to create pJL69. The pJL69 vector was next used to create *PIF1* point mutations by site directed mutagenesis using QuikChange Site-Directed Mutagenesis (Stratagene). The following primers were used (mutated bases are highlighted): *pif1-K264R* was created using PIF1-K264R-up (5'-GAGTGCCGGTACCGGTAGATCCATTCTTTTACGTG-3') and PIF1-K264R-low (5'-CACGTAAAAGAATGGATCTACCGGTACCGGCACTC-3'), *pif1-m1* using PIF1-M1-up (5'-CTTGTATCAATCAATTTTGGGCCCAAAGTGGATAAGATC-3') and PIF1-M1-low (5'-GATCTTATCCACTTTGGGGCCCAAATGATTGATACAAG-3'), *pif1-m2* using PIF1-M2-up (5'-CCAAACTATCGTTTTCTGCCTCGAGTCGTGGTTTCAGGTC-3') and PIF1-M2-low (5'-

GACCTGAAACCACGACTCGAGGCCAGAAAACGATAGTTTGG-3'). After verification by sequencing of the presence of the mutation, a *XbaI/XhoI* fragment (*pif1-K264R* and *pif1-m1*) or a *XbaI/BseRI* fragment (*pif1-m2*) was cloned into pRS306 plasmid at the same sites (*XbaI/XhoI* for *pif1-K264R* and *pif1-m1*; *XbaI/BseRI* for *pif1-m2*). This creates pJL71 (*pif1-K264R*), pJL72 (*pif1-m1*) and pJL73 (*pif1-m2*).

For *pif1-m2* overexpression, the entire ORF containing *pif1-m2* mutation plus the 5' and 3' noncoding region was amplified from yeast genomic DNA (from strain ORT5085-1C) with primers PIF1A (5'-AATGGCAAGTTTGCCGAA-3') and PIF1B (5'-TGCTTCCTGTCAGCTTGGTT-3'); next this PCR product was cloned in pCR2.1 vector (Invitrogen) which creates pJL75. A *SacI/NotI* fragment from pJL75 containing the entire PCR product was introduced in a 2 $\mu$  replicative plasmid pRS426 containing the *URA3* marker to create pJL76. This plasmid was transformed in the yeast strain ORT4841 and the resulting transformants (ORT5086) were selected for uracil prototrophy.

The *PfIMI/BseRI* fragment from pVS102PKA [8], which carries *pif1-K264A* mutation, was inserted at *PfIMI/BseRI* sites in pJL75, replacing *pif1-m2* mutation by *pif1-K264A* mutation, to create pJL78. The *SacI/NotI* fragment, containing the entire ORF with *pif1-K264A* mutation plus the 5' and 3' noncoding region from pJL78 was inserted at *SacI/NotI* in pRS306 plasmid, which creates pJL79. The plasmids pJL71 (*pif1-K264R*), pJL72 (*pif1-m1*), pJL73 (*pif1-m2*) and pJL79 (*pif1-K264A*) were linearized with *Bsu36I*, *AflIII*, *AflIII* and *BstEII* respectively, and introduced by transformation pop-in pop-out at the *PIF1* locus in the yeast strain ORT2914. Correct integration of the plasmids was verified by Southern blot analysis.

**Instability of tandem repeated sequences on plasmids.** For plasmids pBK3, pBK1, pMD28, pEAS20 and pBK10, alteration in tract length results in an out of frame insertion

which can be selected on medium containing 5-Fluoro-Orotic-Acid (5-FOA) as previously described [6].

**Synthetic minisatellites.** The synthetic minisatellites were generated by PCR using complementary primers: 39x2-up (5' TCAGCCAGGGACCTCCGCAGGCCACCCTCCCTCCCCCTCAGCCAGGGACCTCCGCAGGCCACCCTCCCTCCCCC 3') and 39x2-low (5' GGGGGAGGGAGGGTGGCCTGCGGAGGTCCCTGGGCTGAGGGGGAGGGAGGGTGGCCTGCGGAGGTCCCTGGGCTGA 3') for the CEB1-WT minisatellites and the primers 39x2mut-up (5' TCAGCGCAGGGACCTCCGCAGGCCACTCTCACTCCCGCTCAGCGCAGGGACCTCCGCAGGCCACTCTACTCCCGC 3') and 39x2mut-low (5' GCGCGGGAGTGAGAGTGGCCTGCGGAGGTCCCTGCGCTGAGCGCGGGAGTGAGAGTGGCCTGCGGAGGTCGCTGCGCTGA 3') for the CEB1-Gmut minisatellites. Mutations interrupting each triplet of guanines are underlined. Principle of the minisatellite synthesis is represented in Figure S3 B. PCR reaction was done with a final concentration of 0.37  $\mu$ M for each oligonucleotide, the PFU Ultra polymerase (1U) (Stratagene) in a total volume of 15  $\mu$ l using the buffer described in Jeffreys *et al.* [9]. Reaction conditions were: 3 min at 95°C for one cycle, and 30 s at 95°C, 30 s at 64°C and 30 s at 72°C +2 s/cycle for 30 cycles and the reaction was terminated by 10 min at 72°C. At the end of the PCR, 0.2 $\mu$ l of recombinant Taq polymerase (Invitrogen) was added during 6 min at 72°C for A-tailing procedure. To increase the quantity of amplified DNA, four identical PCR reactions were performed in parallel. These PCR products were pooled, precipitated and electrophoresed in 0.8% agarose gel. DNA fragments around 1 kb were extracted from agarose gel with NucleoSpin Extract II kit (Macherey–Nalgen), cloned in pGEM-T Easy vector (Promega) and sequenced with the Big Dye Terminator version 3.1 kit (Perkin Elmer) and 20% Betaine (Sigma) (Figure S3). Synthetic CEB1 minisatellites were inserted on chromosome VIII in the *ARG4* promoter as described for *hRAS1* minisatellite.

## Supplemental References

1. Lopes J, Ribeyre C, Nicolas A (2006) Complex minisatellite rearrangements generated in the total or partial absence of Rad27/hFEN1 activity occur in a single generation and are Rad51 and Rad52 dependent. *Mol Cell Biol* 26: 6675-6689.
2. Debrauwere H, Buard J, Tessier J, Aubert D, Vergnaud G, et al. (1999) Meiotic instability of human minisatellite CEB1 in yeast requires DNA double-strand breaks. *Nat Genet* 23: 367-371.
3. Voth WP, Jiang YW, Stillman DJ (2003) New 'marker swap' plasmids for converting selectable markers on budding yeast gene disruptions and plasmids. *Yeast* 20: 985-993.
4. Soustelle C, Vedel M, Kolodner R, Nicolas A (2002) Replication protein A is required for meiotic recombination in *Saccharomyces cerevisiae*. *Genetics* 161: 535-547.
5. Goldstein AL, McCusker JH (1999) Three new dominant drug resistance cassettes for gene disruption in *Saccharomyces cerevisiae*. *Yeast* 15: 1541-1553.
6. Kokoska RJ, Stefanovic L, Tran HT, Resnick MA, Gordenin DA, et al. (1998) Destabilization of yeast micro- and minisatellite DNA sequences by mutations affecting a nuclease involved in Okazaki fragment processing (rad27) and DNA polymerase delta (pol3-t). *Mol Cell Biol* 18: 2779-2788.
7. Jauert PA, Edmiston SN, Conway K, Kirkpatrick DT (2002) *RAD1* controls the meiotic expansion of the human HRAS1 minisatellite in *Saccharomyces cerevisiae*. *Mol Cell Biol* 22: 953-964.
8. Zhou J, Monson EK, Teng S, Schulz VP, Zakian VA (2000) Pif1p helicase, a catalytic inhibitor of telomerase in yeast. *Science* 289: 771-774.
9. Jeffreys AJ, Neumann R, Wilson V (1990) Repeat unit sequence variation in minisatellites: a novel source of DNA polymorphism for studying variation and mutation by single molecule analysis. *Cell* 60: 473-485.
