# Supplementary material for: The Yeast Pif1 Helicase Prevents Genomic Instability Caused by G-Quadruplex-Forming CEB1 Sequences In Vivo
Source: PLoS Genet. 2009 May 8;5(5):e1000475. doi: 10.1371/journal.pgen.1000475 (PMC2673046; doi:10.1371/journal.pgen.1000475)
Supplement: Table S1 — List of strains used in this study. (0.10 MB PDF) [file pgen.1000475.s004.pdf]

**TABLE S1. Genotypes of yeast strains used in this study**

| Strain             | Relevant genotype                                                                       | Source                   |
|--------------------|-----------------------------------------------------------------------------------------|--------------------------|
| ORT2914            | <i>MAT α</i> CEB1-1.8 <i>ARG4</i>                                                       | Lopes <i>et al.</i> 2006 |
| ORT4840            | <i>MAT α srs2:: KanMX4</i> CEB1-1.8 <i>ARG4</i>                                         | This study               |
| ORT4849            | <i>MAT α sgs1:: KanMX4</i> CEB1-1.8 <i>ARG4</i>                                         | This study               |
| ORT4880            | <i>MAT α rrm3:: KanMX4</i> CEB1-1.8 <i>ARG4</i>                                         | This study               |
| ORT4885            | <i>MAT α mph1:: KanMX4</i> CEB1-1.8 <i>ARG4</i>                                         | This study               |
| ORT5084-2C         | <i>MAT α pif1-m1</i> CEB1-1.8 <i>ARG4</i>                                               | This study               |
| ORT5085-1C         | <i>MAT α pif1-m2</i> CEB1-1.8 <i>ARG4</i>                                               | This study               |
| ORT5083-4E         | <i>MAT α pif1-K264R</i> CEB1-1.8 <i>ARG4</i>                                            | This study               |
| ORT5087-5E         | <i>MAT α pif1-K264A</i> CEB1-1.8 <i>ARG4</i>                                            | This study               |
| ORT4841            | <i>MAT α pif1:: KanMX4</i> CEB1-1.8 <i>ARG4</i>                                         | This study               |
| ORT4843            | <i>MAT α pif1:: KanMX4</i> CEB1-1.8 <i>ARG4</i>                                         | This study               |
| ORD7557-10B        | <i>MAT α pif1:: KanMX4</i> CEB1-0.6 <i>ARG4</i>                                         | This study               |
| ORD7598-12C        | <i>MAT α pif1:: KanMX4</i> CEB1-3.0 <i>ARG4</i>                                         | This study               |
| ORT4841-4E1        | <i>MAT α pif1:: KanMX4</i> CEB1-3.5 <i>ARG4</i>                                         | This study               |
| ORD7569            | <i>MAT α/α pif1:: KanMX4/pif1:: KanMX4</i> CEB1-1.8 <i>ARG4</i> / CEB1-1.8 <i>ARG4</i>  | This study               |
| ORT5086            | <i>MAT α pif1:: KanMX4</i> CEB1-1.8 <i>ARG4</i> + pJL76                                 | This study               |
| ORT4848            | <i>MAT α pif1:: KanMX4 dna2:: HygMX4</i> CEB1-1.8 <i>ARG4</i>                           | This study               |
| ORT5604            | <i>MAT α</i> CEB1-1.8 <i>ARG4</i> + pMD28                                               | This study               |
| ORT5606            | <i>MAT α</i> CEB1-1.8 <i>ARG4</i> + pBK1                                                | This study               |
| ORT5614            | <i>MAT α</i> CEB1-1.8 <i>ARG4</i> + pBK3                                                | This study               |
| ORT5602            | <i>MAT α</i> CEB1-1.8 <i>ARG4</i> + pBK10                                               | This study               |
| ORT5608            | <i>MAT α</i> CEB1-1.8 <i>ARG4</i> + pEAS20                                              | This study               |
| ORT5600            | <i>MAT α pif1:: KanMX4</i> CEB1-1.8 <i>ARG4</i> + pMD28                                 | This study               |
| ORT4896            | <i>MAT α pif1:: KanMX4</i> CEB1-1.8 <i>ARG4</i> + pBK1                                  | This study               |
| ORT4894            | <i>MAT α pif1:: KanMX4</i> CEB1-1.8 <i>ARG4</i> + pBK3                                  | This study               |
| ORT4892            | <i>MAT α pif1:: KanMX4</i> CEB1-1.8 <i>ARG4</i> + pBK10                                 | This study               |
| ORT4898            | <i>MAT α pif1:: KanMX4</i> CEB1-1.8 <i>ARG4</i> + pEAS20                                | This study               |
| AND1228-2A         | <i>MAT α pif1:: KanMX4</i> hRAS1-2.1 <i>ARG4</i>                                        | This study               |
| AND1228-8C         | <i>MAT α rad27:: HIS3</i> hRAS1-2.1 <i>ARG4</i>                                         | This study               |
| ORT6009            | <i>MAT α rad27:: HIS3</i> CEB1-1.8 <i>ARG4</i> + pMD28                                  | This study               |
| ORT6014            | <i>MAT α rad27:: HIS3</i> CEB1-1.8 <i>ARG4</i> + pBK1                                   | This study               |
| ORT6013            | <i>MAT α rad27:: HIS3</i> CEB1-1.8 <i>ARG4</i> + pBK3                                   | This study               |
| ORT6011            | <i>MAT α rad27:: HIS3</i> CEB1-1.8 <i>ARG4</i> + pBK10                                  | This study               |
| ORT6016            | <i>MAT α rad27:: HIS3</i> CEB1-1.8 <i>ARG4</i> + pEAS20                                 | This study               |
| ORD7574-11C        | <i>MAT α rad51:: LEU2</i> CEB1-1.8 <i>ARG4</i>                                          | This study               |
| ORD6786-4A         | <i>MAT α rif1:: KanMX4</i> CEB1-1.8 <i>ARG4</i>                                         | This study               |
| ORD6713-8D         | <i>MAT α rad27:: HIS3</i> CEB1-1.8 <i>ARG4</i>                                          | Lopes <i>et al.</i> 2006 |
| ORD7574-9B         | <i>MAT α pif1:: KanMX4 rad51:: LEU2</i> CEB1-1.8 <i>ARG4</i>                            | This study               |
| ORD7565-2C         | <i>MAT α pif1:: KanMX4 rad52:: LEU2</i> CEB1-1.8 <i>ARG4</i>                            | This study               |
| ORD9922-4B         | <i>MAT α pif1:: HIS3 sgs1:: KanMX4</i> CEB1-1.8 <i>ARG4</i>                             | This study               |
| ORD9304-9A         | <i>MAT α pif1:: HIS3 rrm3:: KanMX4</i> CEB1-1.8 <i>ARG4</i>                             | This study               |
| ORD6708            | <i>MAT α/α rad27:: HIS3/ rad27:: HIS3</i> CEB1-1.8 <i>ARG4</i> / CEB1-0.6 <i>arg4bg</i> | Lopes <i>et al.</i> 2002 |
| AND1207-9B         | <i>MAT α</i> CEB1-WT-2.3 <i>ARG4</i>                                                    | This study               |
| AND1212-10D        | <i>MAT α</i> CEB1-WT-1.7 <i>ARG4</i>                                                    | This study               |
| AND1213-1D         | <i>MAT α</i> CEB1-WT-1.0 <i>ARG4</i>                                                    | This study               |
| AND1202-13D-P14C3  | <i>MAT α pif1:: KanMX4</i> CEB1-WT-1.9 <i>ARG4</i>                                      | This study               |
| AND1202-11A        | <i>MAT α pif1:: KanMX4</i> CEB1-WT-1.7 <i>ARG4</i>                                      | This study               |
| AND1202-11A-L8C12  | <i>MAT α pif1:: KanMX4</i> CEB1-WT-1.3 <i>ARG4</i>                                      | This study               |
| ORT6108-4          | <i>MAT α pif1:: KanMX4</i> CEB1-WT-1.0 <i>ARG4</i>                                      | This study               |
| AND1218-1A         | <i>MAT α rad27:: HIS3</i> CEB1-WT-1.7 <i>ARG4</i>                                       | This study               |
| ORT6110-1          | <i>MAT α rad27:: HIS3</i> CEB1-WT-1.0 <i>ARG4</i>                                       | This study               |
| AND1206-5D         | <i>MAT α</i> CEB1-Gmut-3.8 <i>ARG4</i>                                                  | This study               |
| AND1227-5C         | <i>MAT α</i> CEB1-Gmut-1.7 <i>ARG4</i>                                                  | This study               |
| AND1206-4C         | <i>MAT α pif1:: KanMX4</i> CEB1-Gmut-3.8 <i>ARG4</i>                                    | This study               |
| AND1206-4C-1B6-1E1 | <i>MAT α pif1:: KanMX4</i> CEB1-Gmut-2.5 <i>ARG4</i>                                    | This study               |
| AND1206-4C-D11P2   | <i>MAT α pif1:: KanMX4</i> CEB1-Gmut-1.7 <i>ARG4</i>                                    | This study               |
| ORT6107-1          | <i>MAT α pif1:: KanMX4</i> CEB1-Gmut-0.7 <i>ARG4</i>                                    | This study               |
| AND1206-4B         | <i>MAT α rad27:: HIS3</i> CEB1-Gmut-3.8 <i>ARG4</i>                                     | This study               |
| AND1226-18B/-17C   | <i>MAT α rad27:: HIS3</i> CEB1-Gmut-1.7 <i>ARG4</i>                                     | This study               |
| ORT6109            | <i>MAT α rad27:: HIS3</i> CEB1-Gmut-0.7 <i>ARG4</i>                                     | This study               |
